# Supplementary material for: Exploring women’s views on factors influencing the quality of maternal care among women of reproductive age in Burkina Faso: a fuzzy cognitive mapping study
Source: Research Square preprint supplement (doi:10.21203/rs.3.rs-7199612/v1), 2025-10-03
Supplement: Supplementary file 1 [file e0615e9994c749f320fde571.docx]

**Supplementary materials**

**Table 1**

List of indicators taken from the literature and adapted with the research team (Arroyave et al., 2021; Chukwuma et al., 2017; Dettrick et al., 2016; Joshi et al., 2014; Kyei et al., 2012; Raru et al., 2022)

1. Early initiation of ANC Visit
2. Regular follow-up ANC
3. Medical procedures
   1. Realize tests
   2. Receive treatment or medication
4. Receive information/advice from healthcare staff
5. Looking after baby at birth
6. Take care of mother at birth
7. Help with breastfeeding (especially primiparous mothers)
8. Health staff should be informed about the woman's health and the risk factors for complications.
9. Take care of the mother after birth
10. Experience childbirth
11. Ease of telephone communication with health staff
12. Availability of emergency transport
    1. Ability to use
13. Continuous electrical power supply/guarantee
14. Availability of running water in the structure
15. Respect for confidentiality during ANC/delivery consultations
16. Accessibility of clean toilets
17. Availability of health staff
18. Cleanliness of premises
19. Health staff take good precautionary hygiene measures
20. Distance from maternity hospital
21. General costs associated with ANC, childbirth, postnatal care
    1. Costs associated with quality of care
22. Provider-patient relationship
    1. Negative or
    2. Positive
23. Dishonesty of health personnel
24. Very strict guidelines
25. History of the mother's delivery or pregnancy

**Table 2: Adjacency matrix of the full category map before the map.**

| Code | C01 | C02 | C03 | C04 | C05 | C06 | C07 | C08 | C09 | C10 | C11 | C12 | C13 | C14 | C15 | C16 | C17 | C18 | C19 | C20 | C21 | C22 |
| --- | --- | --- | --- | --- | --- | --- | --- | --- | --- | --- | --- | --- | --- | --- | --- | --- | --- | --- | --- | --- | --- | --- |
| C01 | 0.0 | 0.0 | 0.0 | 0.0 | 0.0 | 0.0 | 0.0 | 0.0 | 0.0 | 0.0 | 0.0 | 0.0 | 0.0 | 0.0 | 0.0 | 0.0 | 0.0 | 0.0 | 0.0 | 0.0 | 0.0 | 0.0 |
| C02 | 0.2 | 0.1 | 0.0 | 0.0 | 0.0 | 0.0 | 0.0 | 0.0 | 0.0 | 0.0 | 0.0 | 0.0 | 0.0 | 0.0 | 0.0 | 0.0 | 0.0 | 0.0 | 0.0 | 0.0 | 0.0 | 0.0 |
| C03 | 0.1 | 0.0 | 0.0 | 0.1 | 0.0 | -0.1 | 0.1 | -0.1 | 0.0 | 0.0 | 0.0 | 0.0 | 0.2 | 0.0 | 0.0 | 0.0 | 0.0 | 0.0 | 0.0 | 0.0 | 0.1 | 0.0 |
| C04 | 0.5 | 0.0 | 0.0 | 0.1 | 0.0 | 0.0 | 0.1 | 0.0 | 0.0 | 0.0 | -0.1 | 0.0 | 0.1 | 0.0 | 0.1 | -0.1 | 0.0 | 0.0 | 0.0 | 0.0 | 0.2 | 0.0 |
| C05 | -0.3 | 0.0 | 0.0 | 0.0 | 0.0 | 0.0 | -0.1 | 0.0 | 0.0 | 0.0 | 0.0 | 0.0 | -0.1 | 0.0 | 0.0 | 0.0 | 0.0 | 0.0 | 0.0 | 0.0 | -0.1 | 0.0 |
| C06 | -0.6 | 0.0 | 0.0 | 0.0 | 0.0 | 0.2 | -0.2 | 0.0 | 0.0 | 0.0 | 0.0 | 0.0 | -0.2 | 0.0 | -0.1 | 0.0 | -0.1 | 0.0 | 0.0 | 0.0 | -0.2 | 0.0 |
| C07 | 0.5 | 0.0 | 0.0 | 0.0 | 0.0 | 0.0 | 0.1 | 0.0 | 0.0 | -0.1 | 0.0 | 0.0 | 0.1 | 0.0 | 0.1 | 0.0 | 0.0 | 0.0 | 0.0 | 0.0 | 0.2 | 0.0 |
| C08 | 0.6 | 0.0 | 0.0 | 0.1 | -0.1 | 0.0 | 0.1 | 0.2 | 0.0 | 0.0 | 0.0 | 0.0 | 0.1 | 0.0 | 0.0 | 0.0 | 0.2 | 0.3 | 0.1 | 0.0 | 0.2 | 0.0 |
| C09 | 0.0 | 0.0 | 0.0 | 0.0 | 0.0 | 0.0 | 0.0 | 0.0 | 0.0 | 0.0 | 0.0 | 0.0 | 0.0 | 0.0 | 0.0 | 0.0 | 0.0 | 0.0 | 0.0 | 0.0 | 0.0 | 0.0 |
| C10 | -0.1 | 0.0 | 0.0 | 0.0 | 0.0 | 0.0 | 0.0 | 0.0 | 0.0 | 0.0 | 0.0 | 0.0 | 0.0 | 0.0 | 0.0 | 0.0 | 0.0 | 0.0 | 0.0 | 0.0 | -0.1 | 0.0 |
| C11 | -1.0 | 0.0 | 0.0 | -0.1 | 0.0 | 0.0 | 0.0 | 0.0 | 0.0 | 0.1 | 0.5 | 0.0 | 0.0 | 0.0 | 0.0 | 0.0 | 0.0 | 0.0 | 0.1 | 0.0 | -0.1 | 0.0 |
| C12 | -0.5 | 0.0 | 0.0 | 0.0 | 0.0 | 0.0 | 0.0 | 0.0 | 0.0 | 0.0 | 0.0 | 0.0 | 0.0 | 0.0 | -0.1 | 0.0 | 0.0 | 0.0 | 0.0 | 0.0 | 0.0 | 0.0 |
| C13 | 0.9 | 0.0 | 0.0 | 0.3 | 0.0 | -0.1 | 0.1 | 0.0 | 0.0 | -0.1 | 0.0 | 0.0 | 0.8 | 0.0 | 0.1 | 0.0 | 0.0 | 0.0 | 0.0 | 0.0 | 0.6 | 0.0 |
| C14 | -0.2 | 0.0 | 0.0 | 0.0 | 0.0 | 0.1 | 0.0 | 0.0 | 0.0 | 0.0 | 0.1 | 0.0 | -0.1 | 0.1 | 0.0 | 0.0 | 0.0 | 0.0 | 0.1 | 0.0 | 0.0 | 0.0 |
| C15 | 0.8 | 0.0 | 0.0 | 0.0 | 0.0 | 0.0 | 0.0 | 0.0 | 0.0 | 0.0 | 0.0 | -0.1 | 0.0 | 0.0 | 0.5 | 0.0 | 0.0 | 0.0 | 0.0 | 0.0 | 0.0 | 0.0 |
| C16 | -0.3 | 0.0 | 0.0 | -0.1 | 0.0 | 0.0 | 0.0 | 0.0 | 0.0 | -0.1 | 0.0 | 0.0 | 0.0 | 0.0 | 0.0 | 0.0 | 0.0 | 0.0 | 0.0 | 0.0 | -0.1 | 0.0 |
| C17 | 0.4 | 0.0 | 0.0 | 0.1 | -0.1 | -0.1 | 0.1 | 0.0 | 0.0 | 0.0 | 0.0 | 0.0 | 0.1 | 0.0 | 0.1 | 0.0 | 0.1 | 0.0 | 0.0 | 0.0 | 0.0 | 0.0 |
| C18 | 0.1 | 0.0 | 0.0 | 0.1 | 0.0 | 0.0 | 0.0 | 0.0 | 0.0 | 0.0 | 0.0 | 0.0 | 0.1 | -0.1 | 0.0 | 0.0 | 0.2 | 0.0 | 0.0 | 0.0 | 0.1 | 0.0 |
| C19 | 0.1 | 0.0 | 0.0 | 0.0 | 0.0 | 0.0 | 0.0 | 0.0 | 0.0 | 0.0 | 0.1 | 0.0 | 0.0 | 0.0 | 0.0 | 0.0 | 0.0 | 0.0 | 0.1 | 0.0 | 0.0 | 0.0 |
| C20 | 0.0 | 0.0 | 0.0 | 0.0 | 0.0 | 0.0 | 0.0 | 0.0 | 0.0 | 0.0 | 0.0 | 0.0 | 0.0 | 0.0 | 0.0 | 0.0 | 0.0 | 0.0 | 0.0 | 0.0 | 0.0 | 0.0 |
| C21 | 0.4 | 0.0 | 0.0 | 0.1 | 0.0 | 0.0 | 0.0 | 0.0 | 0.0 | 0.0 | 0.0 | 0.0 | 0.2 | 0.0 | 0.1 | 0.0 | 0.0 | 0.0 | 0.0 | 0.0 | 0.3 | 0.0 |
| C22 | 0.2 | 0.0 | 0.0 | 0.0 | 0.0 | 0.0 | 0.0 | 0.0 | 0.0 | 0.0 | -0.1 | 0.0 | 0.0 | 0.0 | 0.0 | 0.0 | 0.0 | 0.0 | 0.0 | 0.0 | 0.0 | 0.0 |

**Figure 1:** Category maps of perception of women of reproductive age on what influences quality of maternal care in Burkina Faso. Legend: This map illustrates the category-level relationships prior to the prompt. It features 20 out of the 22 categories, excluding one category absent after transitive closure due to the relationship disappearing (C20) and another introduced post-prompt. Bolder lines indicate stronger relationships. Dashed lines indicate negative relationships. To ensure proper visualization, we have labelled only the 8 categories with the eight strongest relationships with quality of maternal care; for the others, refer to Table 3.

**
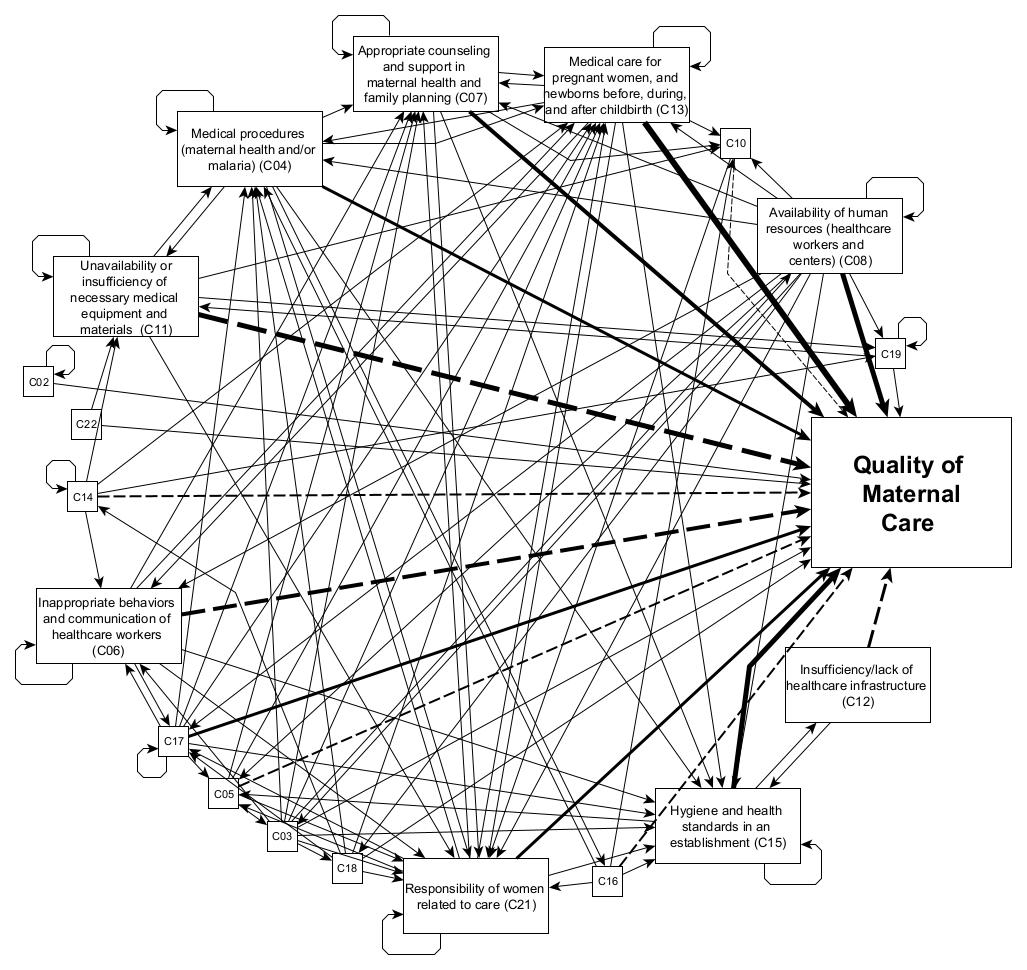
**

**Figure 2:** Perception of women of reproductive age on factors influencing quality of maternal care (after prompting questions)- composite results of 8 fuzzy cognitive mapping sessions in Burkina Faso.

**
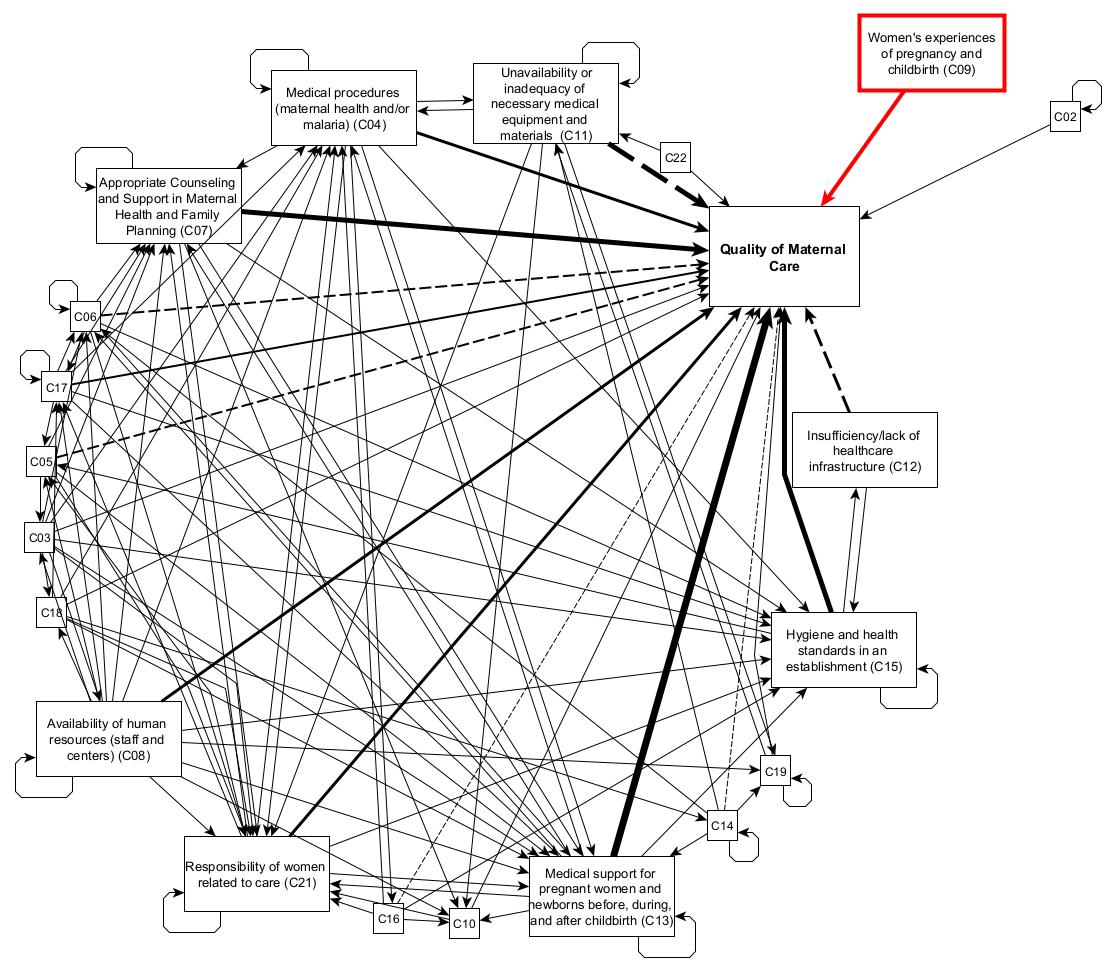
**

Legend: This map illustrates the category-level relationships after the prompting question, focusing on the categories with the strongest associaiton with the quality of maternal care. It features 21 out of 22 categories, excluding one category absent after transitive closure. The new category is highlighted in red. Bolder lines indicate stronger relationships.
